# Supplementary material
Source: Atypon-hosted journal article supplement (https://static.yanyin.tech/literature/current_protocol/10.1002/cpz1.419/attachments/downloadSupplement)
Supplement: downloadSupplement [file downloadSupplement]

# Supporting Information

## A Comprehensive Guide for Assessing Covalent Inhibition in Enzymatic Assays Illustrated with Kinetic Simulations

Elma Mons,<sup>1,2\*</sup> Sander Roet,<sup>3</sup> Robbert Q. Kim,<sup>1</sup> and Monique P.C. Mulder<sup>1\*</sup>

<sup>1</sup> Department of Cell and Chemical Biology, Oncode Institute, Leiden University Medical Center, 2300 RC Leiden, The Netherlands

<sup>2</sup> Current: Institute of Biology Leiden, Leiden University, 2333 BE Leiden, The Netherlands

<sup>3</sup> Department of Chemistry, Norwegian University of Science and Technology, Høgskoleringen 5, 7491 Trondheim, Norway

\* Corresponding Author. Email: m.w.e.mons@biology.leidenuniv.nl; m.p.c.mulder@lumc.nl

|                                                                                                |     |
|------------------------------------------------------------------------------------------------|-----|
| <b>Table of Contents</b>                                                                       | SI- |
| Figure S1. Comparison of linear and nonlinear regression.                                      | 2   |
| Table S1. Kinetic parameters for simulated inhibitors used in this work to illustrate methods. | 3   |
| Table S2. Kinetic Parameters ( <i>pseudo-first order reaction conditions</i> )                 | 3   |
| Table S3. Comparison kinetic parameters Michaelis-Menten and 2-step IRREV inhibition           | 4   |
| Derivatization of Equilibrium Constants                                                        | 5   |
| General Algebraic Equations                                                                    | 6   |

## Supporting Figures

Linear regression methods are sometimes used to analyze preincubation-dependent enzyme inhibition (*Method III* and *IV*) because linear regression does not require dedicated graphical software, and benchmark protocols (Ito et al., 1998; Kitz & Wilson, 1962) promoting linear regression originate from a time that computation with nonlinear regression was not readily available. Here, observed reaction rate  $k_{\text{obs}}$  is calculated from the linear slope of the natural logarithm of the percentage remaining enzyme activity against preincubation time (Figure S1A). The straight line enables relatively simple visual inspection of the fit. For readers that prefer this visual output, we recommend to fit the data by nonlinear regression but plot the preincubation time-dependent enzyme activity on a semilog scale (Figure S1B).

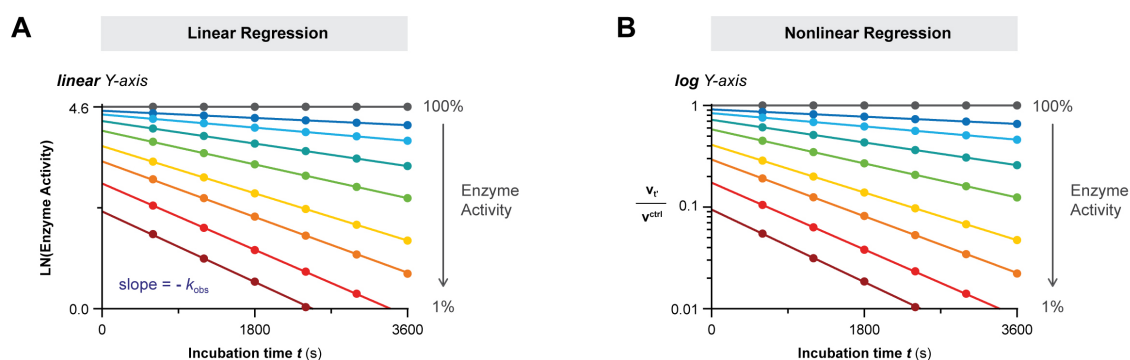

Figure S1. Comparison of linear and nonlinear regression. Illustrated with the data of inhibitor **C** in *Method III* (original data in Figure 15C). **A**) Linear regression. Reaction rate  $k_{\text{obs}}$  is obtained from the negative slope of the natural logarithm of percentage enzyme activity against preincubation time  $t'$ .  $\text{LN}(\text{enzyme activity}) = \text{LN}(100\% \cdot v_t / v^{\text{ctrl}})$ . Negative values for  $\text{LN}(\text{enzyme activity})$  corresponding with enzyme activity below 1% are excluded as assay sensitivity is normally insufficient to accurately distinguish 99% from 99.9% inhibition though this error will significantly affect the linear fit of  $k_{\text{obs}}$ . **B**) Nonlinear regression. Plot preincubation time-dependent enzyme activity against preincubation time on a semilog scale for visual inspection of the fit.

## Supporting Tables

**Table S1.** Kinetic parameters for simulated inhibitors used in this work to illustrate methods

|                  |                              | <i>Input</i>                |                       |                           |                       | <i>Kinetic parameters<sup>a</sup></i> |                 |                      |                                                     |
|------------------|------------------------------|-----------------------------|-----------------------|---------------------------|-----------------------|---------------------------------------|-----------------|----------------------|-----------------------------------------------------|
| <b>Substrate</b> | <b>Mechanism</b>             | $k_1$<br>( $M^{-1}s^{-1}$ ) | $k_2$<br>( $s^{-1}$ ) | $k_{cat}$<br>( $s^{-1}$ ) |                       | $K_d$<br>( $\mu M$ )                  |                 | $K_M$<br>( $\mu M$ ) | $k_{cat}/K_M$<br>( $M^{-1}s^{-1}$ )                 |
| <b>S1</b>        | Substrate                    | $10^8$                      | 100                   | 1                         |                       | 1.00                                  |                 | 1.01                 | $9.9 \times 10^5$                                   |
| <b>L1</b>        | Ligand                       | $10^8$                      | 100                   | 0                         |                       | 1.00                                  |                 | -                    | -                                                   |
| <b>Inhibitor</b> | <b>Mechanism<sup>b</sup></b> | $k_3$<br>( $M^{-1}s^{-1}$ ) | $k_4$<br>( $s^{-1}$ ) | $k_5$<br>( $s^{-1}$ )     | $k_6$<br>( $s^{-1}$ ) | $K_i$<br>(nM)                         | $K_i^*$<br>(nM) | $K_I$<br>(nM)        | $k_{inact}/K_I$ Or<br>$k_{chem}$ ( $M^{-1}s^{-1}$ ) |
| <b>A</b>         | A                            | 10,000                      | 0.0001                | 0                         | 0                     | 10                                    | -               | -                    | -                                                   |
| <b>B</b>         | B                            | $10^8$                      | 10                    | 0.001                     | 0.0001                | 100                                   | 9.1             | -                    | -                                                   |
| <b>C</b>         | C                            | $10^8$                      | 10                    | 0.001                     | 0                     | 100                                   | -               | 100                  | $10^4$                                              |
| <b>D</b>         | D                            | 10,000                      | 0                     | 0                         | 0                     | -                                     | -               | -                    | $10^4$                                              |

Reaction dynamics are illustrated in Table 1. <sup>a</sup> Calculated from microscopic rate constants in Table S2 and Table S3. <sup>b</sup> Mechanism in Figure 1.

**Table S2.** Kinetic Parameters (pseudo-first order reaction conditions)

|                                                         | <b>1-step REV</b>            | <b>2-step REV</b>                                                       | <b>2-step IRREV</b>                                                         | <b>1-step IRREV</b>         |
|---------------------------------------------------------|------------------------------|-------------------------------------------------------------------------|-----------------------------------------------------------------------------|-----------------------------|
| $K_i$ (M)                                               | $\frac{k_4}{k_3}$            | $\frac{k_4}{k_3}$                                                       | $\frac{k_4}{k_3}$                                                           | -                           |
| $K_i^*$ (M)                                             | -                            | $\frac{k_4}{k_3 + \frac{k_3 k_5}{k_6}}$                                 | -                                                                           | -                           |
| $K_I$ (M)                                               | -                            | -                                                                       | $\frac{k_4 + k_{inact}}{k_3}$                                               | -                           |
| $k_{off}$ ( $s^{-1}$ )                                  | $k_4$                        | $\frac{k_4 k_6}{k_3 + k_5 + k_6}$                                       | 0                                                                           | 0                           |
| $k_{obs}$ ( $s^{-1}$ )                                  | $k_4 + k_3[I]$               | $k_6 + \frac{k_5[I]}{\left(\frac{k_4}{k_3}\right) + [I]}$               | $\frac{k_{inact}[I]}{\left(\frac{k_4 + k_{inact}}{k_3}\right) + [I]}$       | $k_{chem}[I]$               |
| <b>Inactivation rate constant</b><br>( $M^{-1}s^{-1}$ ) | -                            | -                                                                       | $\frac{k_{inact}}{K_I} = \frac{k_3 k_{inact}}{k_4 + k_{inact}}$             | $k_{chem}$                  |
| $t_{1/2}$ (s)                                           | $\frac{LN(2)}{k_4 + k_3[I]}$ | $\frac{LN(2)}{k_6 + \frac{k_5[I]}{\left(\frac{k_4}{k_3}\right) + [I]}}$ | $\frac{\left(\frac{k_4 + k_{inact}}{k_3} + [I]\right) LN(2)}{k_{inact}[I]}$ | $\frac{LN(2)}{k_{chem}[I]}$ |
| $t_{1/2diss}$ (s)                                       | $\frac{LN(2)}{k_4}$          | $\frac{(k_3 + k_5 + k_6)LN(2)}{k_4 k_6}$                                | 0                                                                           | 0                           |
| $\tau$ (s)                                              | $\frac{1}{k_4}$              | $\frac{(k_3 + k_5 + k_6)}{k_4 k_6}$                                     | $\infty$                                                                    | $\infty$                    |

General formulas are provided in the Supporting Information.

**Table S3.** Similarities in parameters for kinetic description of substrate hydrolysis for enzymes complying with Michaelis-Menten kinetics, and inactivation potency of two-step covalent inhibitors.

| Michaelis-Menten Enzyme          |                                                                    | Covalent 2-step Inactivation*      |                                                                        |                                                                                             |
|----------------------------------|--------------------------------------------------------------------|------------------------------------|------------------------------------------------------------------------|---------------------------------------------------------------------------------------------|
| Parameter (Unit)                 | Formula                                                            | Parameter (Unit)                   | Formula                                                                | Meaning                                                                                     |
| $K_s$ or $K_d$ (M)               | $K_d = \frac{k_2}{k_1}$                                            | $K_i$ (M)                          | $K_i = \frac{k_4}{k_3}$                                                | Dissociation constant for non-covalent ES or EI complex                                     |
| $K_M$ (M)                        | $K_M = \frac{k_2 + k_{cat}}{k_1}$<br>$= K_d + \frac{k_{cat}}{k_1}$ | $K_I$ (M)                          | $K_I = \frac{k_4 + k_{inact}}{k_3}$<br>$= K_i + \frac{k_{inact}}{k_3}$ | Concentration at half-maximum; [S] at $\frac{1}{2}V_{max}$ or [I] at $\frac{1}{2}k_{inact}$ |
| $k_{cat}$ ( $s^{-1}$ )           | $k_{cat} = k_{max}$                                                | $k_{inact}$ ( $s^{-1}$ )           | $k_{inact} = k_{max}$                                                  | Reaction rate of irreversible step at saturating [S] or [I]                                 |
| $k_{cat}/K_M$ ( $M^{-1}s^{-1}$ ) | $\frac{k_{cat}}{K_M} = \frac{k_1 k_{cat}}{k_2 + k_{cat}}$          | $k_{inact}/K_I$ ( $M^{-1}s^{-1}$ ) | $\frac{k_{inact}}{K_I} = \frac{k_3 k_{inact}}{k_4 + k_{inact}}$        | Efficiency of substrate conversion/enzyme inactivation                                      |
| $V_{max}$ ( $M \cdot s^{-1}$ )   | $V_{max} = k_{cat}[E]_0$                                           | -                                  | -                                                                      | $[E]_0$ -dependent maximum velocity of product formation                                    |

\* Mechanism in Figure 1C.

$K_d$  = dissociation constant for noncovalent  $E + S \leftrightarrow ES$  equilibrium (M),  $k_1$  = association rate constant for  $E + S \leftrightarrow ES$  equilibrium ( $M^{-1}s^{-1}$ ),  $k_2$  = dissociation rate constant for  $E + S \leftrightarrow ES$  equilibrium ( $s^{-1}$ ),  $k_{cat}$  = rate constant for irreversible  $ES \rightarrow E + P$  reaction ( $s^{-1}$ ) and  $K_M$  = Michaelis constant for substrate hydrolysis (M).  $K_i$  = inhibition constant for noncovalent  $E + I \leftrightarrow EI$  equilibrium (M),  $k_3$  = association rate constant for  $E + I \leftrightarrow EI$  equilibrium ( $M^{-1}s^{-1}$ ),  $k_4$  = dissociation rate constant for  $E + I \leftrightarrow EI$  equilibrium ( $s^{-1}$ ),  $k_{inact} = k_5$  = association rate constant for  $EI \rightarrow EI^*$  reaction ( $s^{-1}$ ) and  $K_I$  = inactivation constant for two-step inactivation (M).

## Derivatization of Equilibrium Constants

### Noncovalent equilibrium constant $K_i$

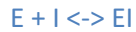

Rates of EI formation and dissociation are at equilibrium

$$k_3[E][I] = k_4[EI]$$

Express  $[E][I]$  as function of  $[EI]$

$$K_i = \frac{[E][I]}{[EI]} = \frac{\frac{k_4}{k_3}[EI]}{[EI]} = \frac{k_4}{k_3}$$

### Steady-state equilibrium constant $K_i^*$

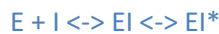

Rate of EI formation/dissociation is at equilibrium step 1 ( $E+I \leftrightarrow EI$ ) and step 2 ( $EI \leftrightarrow EI^*$ )

$$k_3[E][I] = k_4[EI]$$

$$k_5[EI] = k_6[EI^*]$$

Express  $[E][I]$  and  $[EI^*]$  as function of  $[EI]$

$$K_i^* = \frac{[E][I]}{[EI^*] + [EI]} = \frac{\frac{k_4[EI]}{k_3}}{\frac{k_5[EI]}{k_6} + [EI]}$$

Divide all by  $[EI]$

$$K_i^* = \frac{\frac{k_4[EI]}{k_3[EI]}}{\frac{k_5[EI]}{k_6[EI]} + \frac{[EI]}{[EI]}} = \frac{\frac{k_4}{k_3}}{\frac{k_5}{k_6} + 1} = \frac{K_i}{\frac{k_5}{k_6} + 1}$$

### Inactivation constant $K_i$

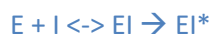

Rate of EI formation is equal to the rate of dissociation

$$k_3[E][I] = (k_4 + k_5)[EI]$$

Express  $[E][I]$  as a function of  $[EI]$

$$K_i = \frac{[E][I]}{[EI]} = \frac{\frac{(k_4 + k_5)}{k_3}[EI]}{[EI]} = \frac{k_4 + k_5}{k_3}$$

## General Algebraic Equations

Association half-life under pseudo-first order reaction conditions ( $[I]_0 > 10[E]_0$ )

$$t_{1/2\text{ass}} = \frac{\text{LN}(2)}{k_{\text{obs}}}$$

Dissociation half-life

$$t_{1/2\text{diss}} = \frac{\text{LN}(2)}{k_{\text{off}}}$$

Target residence time

$$\tau = \frac{1}{k_{\text{off}}}$$

## Preincubation Time-dependent Enzyme Occupancy

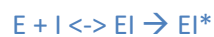

Expected covalent occupancy  $[EI^*]_{t'}/[E]_0$  after preincubation  $t'$

$$\frac{[EI^*]_{t'}}{[E]_0} = 1 - e^{-k_{\text{obs}}t'}$$

Minimum  $k_{\text{obs}}$  to detect minimum covalent occupancy  $[EI^*]_{t'}/[E]_0 \geq 0.6$  after preincubation  $t'$

$$k_{\text{obs}} = \frac{\text{LN}\left(1 - \frac{[EI^*]_{t'}}{[E]_0}\right)}{t'} = \frac{\text{LN}(1 - 0.6)}{t'}$$

Minimum preincubation time  $t'$  to reach covalent occupancy  $[EI^*]_{t'}/[E]_0 \geq 0.6$

$$t' = \frac{\text{LN}\left(1 - \frac{[EI^*]_{t'}}{[E]_0}\right)}{k_{\text{obs}}} = \frac{\text{LN}(1 - 0.6)}{k_{\text{obs}}}$$

## Uninhibited Enzyme Activity

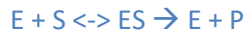

Uninhibited product formation velocity under steady-state conditions ( $[S]_0 \geq 10[E]_0$  and  $[P]_t < 0.1[S]_0$ ).

$$v^{\text{ctrl}} = \frac{k_{\text{cat}}[E]_0[S]}{K_M + [S]}$$

Maximum enzyme concentration  $[E]_0$  for 10% substrate conversion during incubation in the uninhibited control ( $[S]_0 \geq 10[E]_0$ )

$$[E]_0^{\text{max}} = \frac{0.1([S] + K_M)}{k_{\text{cat}}t} = \frac{[S] + K_M}{10k_{\text{cat}}t}$$

Maximum incubation time  $t$  for 10% substrate conversion in the uninhibited control ( $[S]_0 \geq 10[E]_0$ )

$$t = \frac{[S] + K_M}{10k_{\text{cat}}[E]_0}$$

## Inhibited Enzyme Activity at Noncovalent Equilibrium

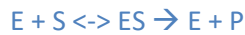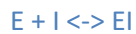

Inhibited product formation velocity after noncovalent equilibrium has been reached ( $[I]_0 \geq 10[E]_0$  and  $[S]_0 \geq 10[E]_0$  and  $[P]_t < 0.1[S]_0$ ).

$$v_i = \frac{k_{\text{cat}}[E]_0[S]}{\left(1 + \frac{[I]}{K_i}\right)K_M + [S]}$$

*Morrison's quadratic equation.* Inhibited product formation velocity after noncovalent equilibrium has been reached ( $[S]_0 \geq 10[E]_0$  with  $[P]_t < 0.1[S]_0$ ), with correction for inhibitor depletion.

$$v_i = v^{\text{ctrl}} \left( 1 - \frac{\left( [E]_0 + [I]_0 + K_i \left( 1 + \frac{[S]}{K_M} \right) \right) - \sqrt{\left( [E]_0 + [I]_0 + K_i \left( 1 + \frac{[S]}{K_M} \right) \right)^2 - 4[E]_0[I]_0}}{2[E]_0} \right)$$

## Equilibrium Concentrations at (Initial) Noncovalent Equilibrium

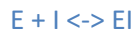

Equilibrium concentration of noncovalent enzyme-inhibitor complex in absence of competitor. ( $[I]_0 \geq 10[E]_0$ )

$$[EI]_{eq} = \frac{[E]_0[I]}{K_i + [I]}$$

*Morrison's quadratic equation.* Equilibrium concentration of noncovalent enzyme-inhibitor complex in absence of competitor with correction for inhibitor depletion.

$$[EI]_{eq} = \frac{([E]_0 + [I]_0 + K_i) - \sqrt{([E]_0 + [I]_0 + K_i)^2 - 4[E]_0[I]_0}}{2}$$

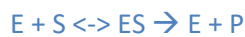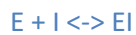

Equilibrium concentration of noncovalent enzyme-inhibitor complex in presence of competitor. ( $[S]_0 \geq 10[E]_0$  and  $[I]_0 \geq 10[E]_0$ )

$$[EI]_{eq} = \frac{[E]_0[I]}{K_i \left(1 + \frac{[S]}{K_M}\right) + [I]}$$

*Morrison's quadratic equation.* Equilibrium concentration of noncovalent enzyme-inhibitor complex in presence of competitor ( $[S]_0 \geq 10[E]_0$ ), with correction for inhibitor depletion.

$$[EI]_{eq} = \frac{\left([E]_0 + [I]_0 + K_i \left(1 + \frac{[S]}{K_M}\right)\right) - \sqrt{\left([E]_0 + [I]_0 + K_i \left(1 + \frac{[S]}{K_M}\right)\right)^2 - 4[E]_0[I]_0}}{2}$$



## Equilibrium Concentrations at Steady-state Equilibrium

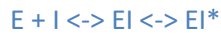

Equilibrium concentrations of bound enzyme in absence of competitor. ( $[I]_0 \geq 10[E]_0$ )

$$[EI + EI^*]_{\text{eq}} = \frac{[E]_0[I]}{K_i^* + [I]}$$

$$[EI^*]_{\text{eq}} = [EI + EI^*]_{\text{eq}} \left(1 - \frac{K_i^*}{K_i}\right) = \frac{[E]_0[I]}{K_i^* + [I]} \left(1 - \frac{K_i^*}{K_i}\right)$$

$$[EI]_{\text{eq}} = [EI + EI^*]_{\text{eq}} \left(\frac{K_i^*}{K_i}\right) = \frac{K_i^*}{K_i} \left(\frac{[E]_0[I]}{K_i^* + [I]}\right) = \frac{K_i^*[E]_0[I]}{K_i(K_i^* + [I])} = \frac{[E]_0[I]}{K_i + \frac{K_i[I]}{K_i^*}}$$

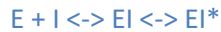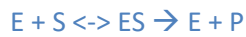

Equilibrium concentrations of bound enzyme in presence of competitor. ( $[I]_0 \geq 10[E]_0$  and  $[S]_0 \geq 10[E]_0$ )

$$[EI + EI^*]_{\text{eq}} = \frac{[E]_0[I]}{K_i^* \left(1 + \frac{[S]}{K_M}\right) + [I]}$$

$$[EI^*]_{\text{eq}} = [EI + EI^*]_{\text{eq}} \left(1 - \frac{K_i^*}{K_i}\right) = \frac{[E]_0[I]}{K_i^* \left(1 + \frac{[S]}{K_M}\right) + [I]} \left(1 - \frac{K_i^*}{K_i}\right)$$

$$[EI]_{\text{eq}} = \frac{K_i^*}{K_i} \left(\frac{[E]_0[I]}{K_i^* + [I]}\right) = \frac{K_i^*}{K_i} \left(\frac{[E]_0[I]}{K_i^* \left(1 + \frac{[S]}{K_M}\right) + [I]}\right)$$
